# Supplementary material for: Is There Still a Place for Tyrosine Kinase Inhibitors for the Treatment of Hepatocellular Carcinoma at the Time of Immunotherapies? A Focus on Lenvatinib
Source: MDPI journal article supplement (doi:10.3390/cancers13246310), 2021-12-16
Supplement: s1 [file s1]

# Is There Still a Place for Tyrosine Kinase Inhibitors for the Treatment of Hepatocellular Carcinoma at the Time of Immunotherapies? A Focus on Lenvatinib

Marie Decraecker, Caroline Toulouse, and Jean-Frédéric Blanc

**Table S1.** Clinical trials of lenvatinib for HCC.

| <b>A: Phase III clinical trials.</b>                 |                   |                                                                                                                                                         |                                                                                                      |                        |                           |
|------------------------------------------------------|-------------------|---------------------------------------------------------------------------------------------------------------------------------------------------------|------------------------------------------------------------------------------------------------------|------------------------|---------------------------|
| <b>Protocol</b>                                      | <b>Identifier</b> | <b>Study Title</b>                                                                                                                                      | <b>Interventions</b>                                                                                 | <b>Number Enrolled</b> | <b>Primary Completion</b> |
| Lenvatinib as Adjuvant (Stage A)                     | NCT04227808       | Lenvatinib as adjuvant therapy for patients who underwent radical resection of HCC with a high risk of recurrence.                                      | Drug: lenvatinib<br>Procedure: Surgery                                                               | 50                     | Dec 2022                  |
|                                                      | NCT03838796       | Lenvatinib combined with TACE for preventing recurrence in high-risk patients                                                                           | Drug: lenvatinib<br>Procedure: TACE                                                                  | 482                    | Dec 2021                  |
|                                                      | NCT04053972       | The impact on recurrence risk of adjuvant lenvatinib for patients with HCC and microvascular invasion (MVI) after hepatectomy.                          | Drug: lenvatinib<br>Procedure: Surgery                                                               | 377                    | Dec 2022                  |
| Lenvatinib and Locoregional treatment (Stage B or C) | NCT03838796       | Lenvatinib combined with TACE for preventing recurrence in high-risk patients                                                                           | Drug: lenvatinib<br>Procedure: TACE                                                                  | 482                    | Dec 2021                  |
|                                                      | NCT04246177       | Lenvatinib (E7080/MK-7902) with pembrolizumab (MK-3475) in combination with TACE vs. TACE in participants with incurable/non-metastatic HCC (LEAP-012). | Drug: lenvatinib<br>Drug: pembrolizumab<br>Drug: oral placebo<br>Drug: IV placebo<br>Procedure: TACE | 950                    | Apr 2025                  |
|                                                      | NCT03775395       | Sorafenib combined with hepatic arterial infusion chemotherapy (HAIC) compared with lenvatinib combined with HAIC in patients with advanced HCC.        | Drug: lenvatinib<br>Drug: sorafenib<br>Procedure: Hepatic arterial infusion chemotherapy             | 250                    | Dec 2021                  |
|                                                      | NCT03905967       | Lenvatinib plus TACE vs. lenvatinib alone for advanced HCC patients.                                                                                    | Procedure: TACE<br>Drug: lenvatinib                                                                  | 336                    | Apr 2023                  |

|                                                        |             |                                                                                                                                                                                                                                                                                                                         |                                                                                                                                    |     |          |
|--------------------------------------------------------|-------------|-------------------------------------------------------------------------------------------------------------------------------------------------------------------------------------------------------------------------------------------------------------------------------------------------------------------------|------------------------------------------------------------------------------------------------------------------------------------|-----|----------|
| Lenvatinib and systemic treatment (Stage C) First-line | NCT04687163 | Lenvatinib plus hepatic artery infusion of 130 mg/m <sup>2</sup> oxaliplatin, leucovorin, and fluorouracil vs. sorafenib or lenvatinib plus hepatic artery infusion of 85 mg/m <sup>2</sup> oxaliplatin, leucovorin, and 1200 mg/m <sup>2</sup> fluorouracil for unresectable advanced HCC: a randomised phase 3 trial. | Drug: HAIC of oxaliplatin, and 5-FU hepatic arterial infusion of oxaliplatin, leucovorin and 5-FU<br>Drug: lenvatinib or sorafenib | 400 | Dec 2022 |
|                                                        | NCT04053985 | Transarterial chemoinfusion (TAI) combined with lenvatinib in advanced HCC.                                                                                                                                                                                                                                             | Drug: lenvatinib<br>Procedure: TAI                                                                                                 | 206 | Dec 2022 |
|                                                        | NCT04194775 | CS1003 in combination with lenvatinib compared to placebo in combination with lenvatinib as first-line therapy in subjects with advanced HCC.                                                                                                                                                                           | Drug: CS1003+ lenvatinib<br>Drug: CS1003 placebo+ lenvatinib                                                                       | 525 | Jun 2023 |
|                                                        | NCT04039607 | Nivolumab plus ipilimumab vs. standard of care (sorafenib or lenvatinib) in all randomised participants with advanced HCC who have not received prior systemic therapy.                                                                                                                                                 | Drug: nivolumab<br>Drug: ipilimumab<br>Drug: sorafenib<br>Drug: lenvatinib                                                         | 650 | Mar 2023 |
|                                                        | NCT04523493 | Toripalimab combined with lenvatinib vs. placebo combined with lenvatinib as 1st-line therapy for advanced HCC.                                                                                                                                                                                                         | Combination drug: toripalimab combined with lenvatinib                                                                             |     | May 2024 |

**B: Phase II clinical trials.**

| Protocol                             | Identifier  | Study Title                                                                                                  | Interventions                                                   | Number Enrolled | Primary Completion |
|--------------------------------------|-------------|--------------------------------------------------------------------------------------------------------------|-----------------------------------------------------------------|-----------------|--------------------|
| Lenvatinib as Neo-adjuvant (Stage A) | NCT04241523 | Lenvatinib as a preoperative conversion therapy in patients with potentially resectable HCC.                 | Drug: lenvatinib 4 mg oral                                      | 50              | Oct 2021           |
|                                      | NCT04273100 | PD-1 mAb combined with lenvatinib and TACE in the treatment of BCLC B/C HCC: single arm, single centre, non- | Combination product: PD-1 mAb combined with TACE and lenvatinib | 56              | Dec 2020           |

|                                                        |             |                                                                                                                                                                |                                                                           |    |            |
|--------------------------------------------------------|-------------|----------------------------------------------------------------------------------------------------------------------------------------------------------------|---------------------------------------------------------------------------|----|------------|
|                                                        |             | randomised, open label study.                                                                                                                                  |                                                                           |    |            |
| Lenvatinib + locoregional treatment (Stage B or C)     | NCT04531228 | TACE-HAIC plus lenvatinib for patients with unresectable HCC.                                                                                                  | Procedure: TACE-HAIC plus lenvatinib                                      | 60 | Apr 2021   |
|                                                        | NCT04368078 | A phase IIB clinical study. Lenvatinib plus toripalimab in patients with advanced HCC and to analyse potential biomarkers of therapeutic response.             | Drug: lenvatinib<br>Drug: toripalimab                                     | 76 | April 2022 |
|                                                        | NCT04444167 | An open-label multi-centre phase Ib/II study. Anti-PD-1/CTLA-4 bispecific antibody AK104 plus lenvatinib as first-line therapy for patients with advanced HCC. | Biological: AK104<br>Drug: lenvatinib                                     | 30 | Jan 2022   |
| Lenvatinib and systemic treatment (Stage C) First-line | NCT03841201 | Immunotherapy with nivolumab in combination with lenvatinib for patients with multinodular, advanced stage HCC in first-line therapy.                          | Drug: lenvatinib<br>Drug: nivolumab                                       | 50 | Jul 2021   |
|                                                        | NCT04401800 | Tislelizumab in combination with lenvatinib in unresectable locally advanced or metastatic HCC.                                                                | Drug: lenvatinib<br>Drug: tislelizumab                                    | 66 | Sep 2022   |
|                                                        | NCT04443309 | Lenvatinib in combination with camrelizumab as first-line therapy in patients with advanced HCC.                                                               | Drug: camrelizumab<br>Drug: lenvatinib                                    | 53 | Aug 2022   |
|                                                        | NCT04170179 | Systemic chemotherapy of oxaliplatin, 5-fluorouracil, and leucovorin plus lenvatinib and toripalimab in                                                        | Procedure: Systemic chemotherapy<br>Drug: lenvatinib<br>Drug: toripalimab | 25 | Nov 2020   |

|                                             |             | patients with HCC with extrahepatic metastases.                                                                                     |                                                                                                    |                 |                    |
|---------------------------------------------|-------------|-------------------------------------------------------------------------------------------------------------------------------------|----------------------------------------------------------------------------------------------------|-----------------|--------------------|
|                                             | NCT03899428 | Immune check-point therapy vs. target therapy in reducing serum HBsAg levels in patients with HBeAg-positive advanced HCC (VICI-5). | Drug: durvalumab<br>Drug: sorafenib<br>Drug: lenvatinib<br>Drug: regorafenib<br>Drug: cabozantinib | 30              | Dec 2021           |
| <b>C: Phase I clinical trials.</b>          |             |                                                                                                                                     |                                                                                                    |                 |                    |
| Protocol                                    | Identifier  | Study Title                                                                                                                         | Interventions                                                                                      | Number Enrolled | Primary Completion |
| Lenvatinib and systemic treatment (Stage C) | NCT04008797 | Phase 2 dose (RP2D) of E7386 in combination with lenvatinib.                                                                        | Drug: E7386<br>Drug: lenvatinib                                                                    | 42              | Mar 2022           |
